# Supplementary material
Source: Springer Nature journal article supplement (https://www.springermedizin.de/resource/supplementary/13075_2012_3997_MOESM7_ESM.pdf/9695740)

**(A)**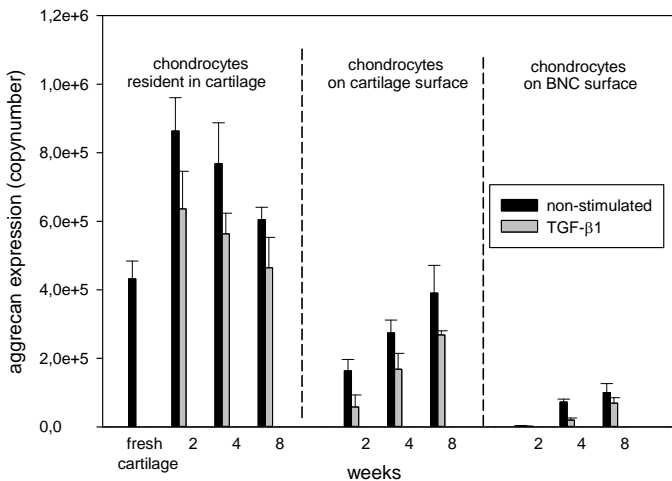**(B)**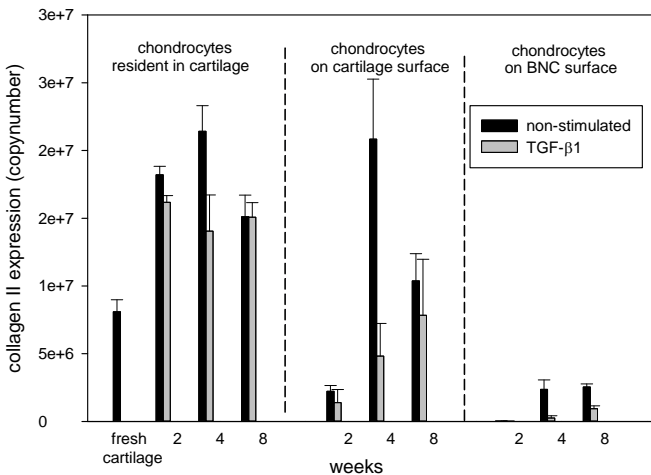**(C)**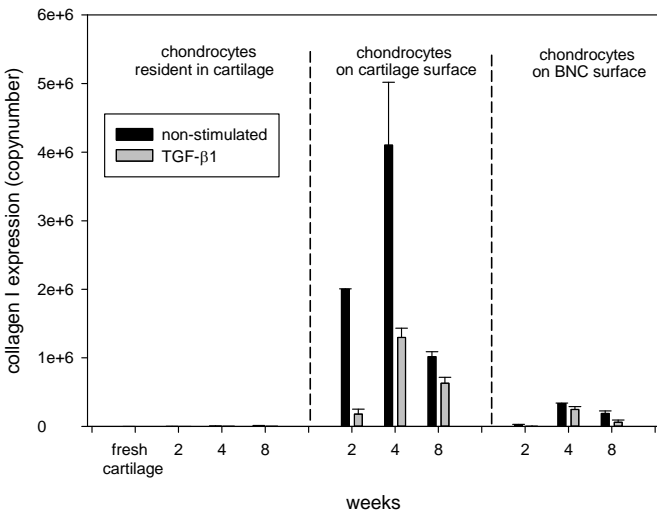

Supplement: MOESM7 [file 9695740]
